# Supplementary material for: The COVID-19 Pandemic and In-Person Visit Rate Disruptions Among Patients With Hematologic Neoplasms in the US in 2020 to 2021
Source: PubMed Central journal article supplement — JAMA Netw Open. 2023 Jun 5;6(6):e2316642. doi: 10.1001/jamanetworkopen.2023.16642 (PMC10242428; doi:10.1001/jamanetworkopen.2023.16642), 2023-06-05
Supplement: jamanetwopen-e2316642-s001.pdf [file jamanetwopen-e2316642-s001.pdf]

## Supplementary Online Content

Goyal G, Lau KW, Wang X, et al. The COVID-19 pandemic and in-person visit rate disruptions among patients with hematologic neoplasms in the US in 2020 to 2021. *JAMA Netw Open*. 2023;6(6):e2316642. doi:10.1001/jamanetworkopen.2023.16642

**eMethods.** (S)ARIMA Models

**eFigure.** Patient Selection Diagram for the Cohort With Hematologic Malignancies

**eTable 1.** Regimen Classification Based on National Comprehensive Cancer Network (NCCN) Guidelines as of April 2021, and Also by Consensus of the Authorship Team

**eTable 2.** ARIMA Model Parameters,  $(p,d,q)(P,D,Q)_m$

**eTable 3.** Q Statistics and *P* Values for All Ljung-Box Q Tests of the Autocorrelation of ARIMA Model Residuals

**eTable 4.** Percent Change in In-Person Visit Rates Across Entire Pandemic Year (March 1, 2020, to February 28, 2021)

**eTable 5.** In-Person Visit Rates in Year Before vs During Pandemic Over All Diseases Combined and by Disease and Treatment Type

**eTable 6.** Telemedicine Visit Rates During Early vs Later Pandemic Months Over All Diseases Combined and by Disease and Treatment Type

This supplementary material has been provided by the authors to give readers additional information about their work.

## eMethods. (S)ARIMA Models

ARIMA models use a linear combination of lagged observations (autoregression) and lagged errors (moving average) to forecast future observations. They are presented as  $ARIMA(p,d,q)$ , where  $p$  is the order of autoregression (number of lagged observations),  $d$  is the order of differencing, and  $q$  is the moving average order (number of lagged errors) and are modelled as:

$$(1 - B)^d \widehat{Y}_t = \alpha + \frac{\theta(B)}{\phi(B)} \varepsilon_t$$

Where  $\widehat{Y}_t$  is the forecasted monthly standardized 30 patient-day rates of in-person treatment visits,  $B$  is a backshift operator (e.g.  $BY_t = Y_{t-1}$ ), and  $\alpha$  is the constant. The autoregressive (AR) operator,  $\phi(B)$ , is equal to  $1 - \phi_1 B^1 - \phi_2 B^2 \dots - \phi_p B^p$  with order  $p$ ; the moving average (MA) operator,  $\theta(B)$ , is equal to  $1 - \theta_1 B^1 - \theta_2 B^2 \dots - \theta_q B^q$  with order  $q$ ;  $\varepsilon_t$  is the error term.

Each (S)ARIMA model was built using the following steps: First, since ARIMA models must fit to stationary data with constant mean, variance, and autocorrelation over time, stationarity of the time series was determined using augmented Dickey-Fuller tests. Orders of differencing increased incrementally until stationarity was achieved. Second, the combination of AR and MA orders that minimize the Akaike Information Criterion were determined using autocorrelation (ACF) and partial autocorrelation (PACF) plots, respectively. Third, goodness-of-fit was tested using the Ljung-Box Q test, which tests whether a time series' autocorrelations are different from zero. A non-significant Q statistic indicated that the data is independently distributed and thus, the model was a good fit. All model parameters selected are outlined in eTable 2 and Ljung-Box Q test results are found in eTable 3.

Seasonal parameters (SARIMA) were utilized if the data exhibited seasonal or cyclical trends (i.e. spikes in ACF plots that occur at regular cadences), presented as  $ARIMA(p,d,q)(P,D,Q)_m$ .  $P$  is the seasonal order of autoregression,  $D$  is the seasonal order of differencing,  $Q$  is the seasonal moving average order, and  $m$  is the number of periods in a season, which was set to 12 as monthly data was used.

**eFigure. Patient Selection Diagram for the Cohort With Hematologic Malignancies**

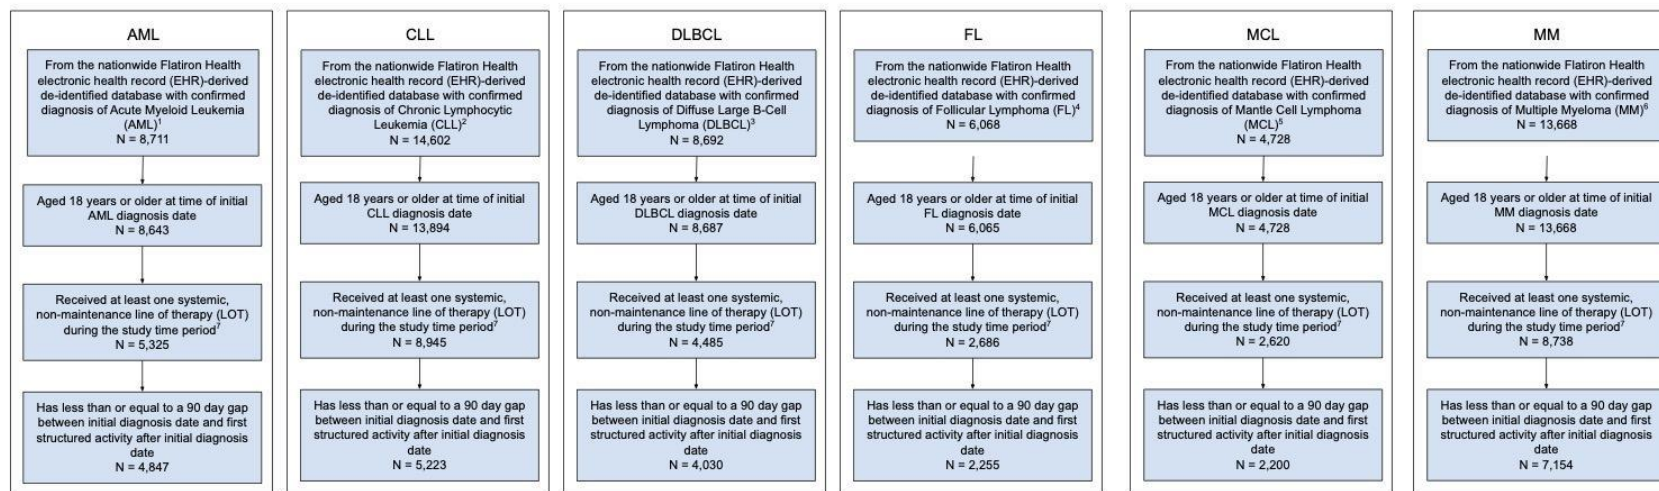

Footnotes:

1. AML patients met the following criteria: (1) Has an ICD diagnosis code of Acute Myeloid Leukemia (AML) [ICD 9: 205.0x, 205.9x, 206.0x, 207.0x, 207.2x; ICD 10: C92.0x, C92.4x, C92.5x, C92.6x, C92.9x, C92.Ax, C93.0x, C94.0x, C94.2x, C94.4x]; (2) Has at least two documented clinical visits, on different days, occurring on or after January 1, 2011; (3) Included in probabilistic sample of patients queued for confirmation of AML diagnosis via abstraction; (4) Has evidence of AML with an initial diagnosis date on or after January 1, 2014
2. CLL patients met the following criteria: (1) Has an ICD diagnosis code of Chronic Lymphocytic Leukemia (CLL) [ICD-9: 204.1x or ICD-10: C91.1x, C83.0x]; (2) Has at least two documented clinical visits, on different days, occurring on or after January 1, 2011; (3) Has at least one order for an antineoplastic occurring on or after January 1, 2011; (4) Included in probabilistic sample of patients queued for confirmation of CLL diagnosis via abstraction; (5) Has physician documentation of CLL and evidence in unstructured documents of having been treated specifically for CLL
3. DLBCL patients met the following criteria: (1) Has an ICD diagnosis code of Non-Hodgkin's Lymphoma (NHL) [ICD 9: 200x, 202x; ICD 10: C82x, C83x, C84x, C85x, C86x, C88x, C96x]; (2) Has at least two documented clinical visits, on different days, occurring on or after January 1, 2011; (3) Included in probabilistic sample of patients queued for confirmation of DLBCL diagnosis via abstraction; (4) Has evidence of DLBCL with an initial diagnosis date on or after January 1, 2011
4. FL patients met the following criteria: (1) Has an ICD diagnosis code of NHL; (2) Has at least two documented clinical visits, on different days, occurring on or after January 1, 2011; (3) Included in probabilistic sample of patients queued for confirmation of FL diagnosis via abstraction; (4) Has evidence of FL with an initial diagnosis date on or after January 1, 2011
5. MCL patients met the following criteria: (1) Has an ICD diagnosis code of NHL; (2) Has at least two documented clinical visits, on different days, occurring on or after January 1, 2011; (3) Included in probabilistic sample of patients queued for confirmation of MCL diagnosis via abstraction; (4) Has evidence of MCL with an initial diagnosis date on or after January 1, 2011
6. MM patients met the following criteria: (1) Has an ICD diagnosis code of Multiple Myeloma (MM) [ICD-9 203.0x or ICD-10 C90.0x, C90]; (2) Has at least two documented clinical visits, on different days, occurring on or after January 1, 2011; (3) Included in probabilistic sample of patients queued for confirmation of MM diagnosis via abstraction; (4) Has evidence of MM with an initial diagnosis date on or after January 1, 2011
7. The study period ran from March 1, 2016 to February 28, 2021.

**eTable 1.** Regimen Classification Based on National Comprehensive Cancer Network (NCCN) Guidelines as of April 2021, and Also by Consensus of the Authorship Team

Type 1 = outpatient oral regimens (OralTx)

Type 2 = outpatient infusional regimens (OutPtTx)

Type 3 = inpatient infusional regimens (InPtTx)

| Disease                                                                            | Drug name             | Drug name(s)        | Type              |
|------------------------------------------------------------------------------------|-----------------------|---------------------|-------------------|
| <b>For all diseases (if applicable to disease and FDA indicated by April 2021)</b> |                       |                     |                   |
|                                                                                    | Autologous transplant |                     | 3                 |
|                                                                                    | Allogeneic transplant |                     | 3                 |
|                                                                                    | CAR T-cell therapy    |                     | 3                 |
|                                                                                    | Clinical study drug   |                     | NA                |
| <b>AML</b>                                                                         |                       |                     |                   |
| AML                                                                                | Azacitidine           | Azacitidine         | 3                 |
| AML                                                                                | Enasidenib            | Enasidenib Mesylate | 1                 |
| AML                                                                                | Gilteritinib          | Gilteritinib        | 1 (3 if with 7+3) |
| AML                                                                                | Glasdegib             | Glasdegib           | 1                 |
| AML                                                                                | Hydroxyurea           | Hydroxyurea         | 1                 |

|     |                       |                                                   |                           |
|-----|-----------------------|---------------------------------------------------|---------------------------|
| AML | Ivosidenib            | Ivosidenib                                        | 1                         |
| AML | Lenalidomide          | Lenalidomide                                      | 1                         |
| AML | Midostaurin           | Midostaurin                                       | 1 (3 if with 7+3)         |
| AML | Sorafenib             | Sorafenib                                         | 1                         |
| AML | Venetoclax            | Venetoclax                                        | 1 (3 if with azacitadine) |
| AML | Tretinoin             | Tretinoin                                         | 3                         |
| AML | 7+3                   | 7+3 Not Otherwise Specified                       | 3                         |
| AML | Vyxeos                | Daunorubicin OR Daunorubicin/Cytarabine Liposomal | 3                         |
| AML | ATO                   | Arsenic                                           | 3                         |
| AML | ATRA                  | Tretinoin                                         | 3                         |
| AML | Decitabine            | Decitabine                                        | 3                         |
| AML | HiDAC                 | Cytarabine                                        | 3                         |
| AML | LDAC                  | Cytarabine                                        | 3                         |
| AML | CLAG                  | Cladribine, Cytarabine, Mitoxantrone              | 3                         |
| AML | FLAG                  | Cytarabine, Fludarabine                           | 3                         |
| AML | GCLAC                 | Clofarabine, Cytarabine                           | 3                         |
| AML | MEC                   | Mitoxantrone, Etoposide, Cytarabine               | 3                         |
| AML | Gemtuzumab Ozogamicin | Gemtuzumab Ozogamicin                             | 3                         |

|              |                             |                                                       |   |
|--------------|-----------------------------|-------------------------------------------------------|---|
| AML          | Idarubicin                  | Idarubicin                                            | 3 |
| <b>DLBCL</b> |                             |                                                       |   |
| DLBCL        | Ibrutinib                   | Ibrutinib                                             | 1 |
| DLBCL        | Lenalidomide + R            | Lenalidomide, Rituximab                               | 2 |
| DLBCL        | Idelalisib                  | Idelalisib                                            | 1 |
| DLBCL        | Temozolomide + Methotrexate | Temozolomide, Methotrexate                            | 3 |
| DLBCL        | Duvelisib                   | Duvelisib                                             | 1 |
| DLBCL        | Selinexor                   | Selinexor                                             | 1 |
| DLBCL        | Tazemetostat                | Tazemetostat                                          | 1 |
| DLBCL        | Acalabrutinib               | Acalabrutinib                                         | 1 |
| DLBCL        | RCHOP                       | Rituximab, Cyclophosphamide, Doxorubicin, Vincristine | 2 |
| DLBCL        | RCVP                        | Rituximab, Cyclophosphamide, Vincristine              | 2 |
| DLBCL        | BR                          | Bendamustine, Rituximab                               | 2 |
| DLBCL        | Pola-BR                     | Polatuzumab, Bendamustine, Rituximab                  | 2 |
| DLBCL        | Pola-R                      | Polatuzumab, Rituximab                                | 2 |

|       |                          |                                                                                 |   |
|-------|--------------------------|---------------------------------------------------------------------------------|---|
| DLBCL | REPOCH                   | Rituximab, Cyclophosphamide, Doxorubicin, Vincristine, Etoposide                | 3 |
| DLBCL | RICE                     | Rituximab, Ifos-famide, Carbo-platin, Etopo-side                                | 3 |
| DLBCL | RGemOx                   | Rituximab, Gemcitabine, and Oxaliplatin                                         | 2 |
| DLBCL | RGCVP                    | Rituximab, Gemcitabine, Cyclophosphamide, Vincristine                           | 2 |
| DLBCL | RESHAP                   | Rituximab, Etoposide, Cytarabine, Cisplatin                                     | 3 |
| DLBCL | RDHAP                    | Rituximab, Dexamethasone, Cytarabine, Cisplatin                                 | 3 |
| DLBCL | RCEPP(B)                 | Rituximab, Cyclophosphamide, Etoposide, Procarbazine, Bleomycin                 | 2 |
| DLBCL | RCEPP                    | Rituximab, Cyclophosphamide, Etoposide, Procarbazine                            | 2 |
| DLBCL | RCEOP                    | Rituximab, Cyclophosphamide, Etoposide, Vincristine                             | 2 |
| DLBCL | High-dose MTX (systemic) | Methotrexate, Leucovorin                                                        | 3 |
| DLBCL | Cytarabine +/- R OR R-MT | Cytarabine with or without Rituximab OR Rituximab, Methotrexate                 | 3 |
| DLBCL | R Hyper CVAD             | Rituximab, Cyclophosphamide, Vincristine, Doxorubicin, Methotrexate, Cytarabine | 3 |
| DLBCL | Copanlisib               | Copanlisib                                                                      | 2 |
| DLBCL | Tafasitamab              | Usually only in combination with Lenalidomide                                   | 2 |
| DLBCL | Ofatumumab               | Only in combination with other drugs like chemos (do not count if monotherapy)  | 2 |

|           |                                     |                                                                                |                   |
|-----------|-------------------------------------|--------------------------------------------------------------------------------|-------------------|
| DLBCL     | Gemcitabine, Oxaliplatin, Rituximab | Gemcitabine, Oxaliplatin, Rituximab or another anti-CD20                       | 2                 |
| DLBCL     | Obinutuzumab                        | Only in combination with other drugs like chemos (do not count if monotherapy) | 2                 |
| DLBCL     | Pembrolizumab                       | Monotherapy or in combination with other drugs                                 | 2                 |
| DLBCL     | Axicabtagene Ciloleucel             | Axicabtagene Ciloleucel                                                        | 3                 |
| DLBCL     | Tisagenlecleucel                    | Tisagenlecleucel                                                               | 3                 |
| DLBCL     | Bortezomib + Lenalidomide           | Bortezomib, Lenalidomide                                                       | 2                 |
| DLBCL     | Cyclo                               | Cyclophosphamide monotherapy                                                   | 2                 |
| DLBCL     | Cyclo + Doxo                        | Cyclophosphamide, Doxorubicin                                                  | 2                 |
| DLBCL     | Cyclo + Fluda + Mesna               | Cyclophosphamide, Fludarabine, Mesna                                           | 2                 |
| DLBCL     | Cyclo + Mesna                       | Cyclophosphamide, Mesna                                                        | 2                 |
| <b>FL</b> |                                     |                                                                                |                   |
| FL        | Duvelisib                           | Duvelisib                                                                      | 1                 |
| FL        | Ibrutinib                           | Ibrutinib                                                                      | 1                 |
| FL        | Idelalisib                          | Idelalisib                                                                     | 1 (2 if + R or G) |



|    |               |                                                                  |                   |
|----|---------------|------------------------------------------------------------------|-------------------|
| FL | Lenalidomide  | Lenalidomide                                                     | 1 (2 if + R or G) |
| FL | Selinexor     | Selinexor                                                        |                   |
| FL | Tazemetostat  | Tazemetostat                                                     | 1                 |
| FL | Acalabrutinib | Acalabrutinib                                                    | 1                 |
| FL | RCHOP         | Rituximab, Cyclophosphamide, Doxorubicin, Vincristine            | 2                 |
| FL | RCVP          | Rituximab, Cyclophosphamide, Vincristine                         | 2                 |
| FL | BR or BG      | Bendamustine, Rituximab OR Bendamustine, Obinutuzumab            | 2                 |
| FL | REPOCH        | Rituximab, Cyclophosphamide, Doxorubicin, Vincristine, Etoposide | 3                 |
| FL | RICE          | Rituximab, Ifos-famide, Carbo-platin, Etopo-side                 | 3                 |
| FL | RGemOx        | Rituximab, Gemcitabine, and Oxaliplatin                          | 2                 |
| FL | RGDP          | Rituximab, Gemcitabine, Cisplatin OR Carboplatin                 | 2                 |
| FL | RGCVP         | Rituximab, Gemcitabine, Cyclophosphamide, Vincristine            | 2                 |
| FL | RESHAP        | Rituximab, Etoposide, Cytarabine, Cisplatin                      | 3                 |
| FL | RDHAP         | Rituximab, Dexamethasone, Cytarabine, Cisplatin                  | 3                 |
| FL | RCEPP(B)      | Rituximab, Cyclophosphamide, Etoposide, Procarbazine, Bleomycin  | 2                 |
| FL | RCEPP         | Rituximab, Cyclophosphamide, Etoposide,                          | 2                 |

|            |                          |                                                                                       |                      |
|------------|--------------------------|---------------------------------------------------------------------------------------|----------------------|
|            |                          | Procarbazine                                                                          |                      |
| FL         | RCEOP                    | Rituximab, Cyclophosphamide, Etoposide, Vincristine                                   | 2                    |
| FL         | High-dose MTX (systemic) | Methotrexate, Leucovorin                                                              | 3                    |
| FL         | RHyperCVAD               | Rituximab, Cyclophosphamide, Vincristine, Doxorubicin                                 | 3                    |
| FL         | Cyclophosphamide         | Cyclophosphamide                                                                      | 2                    |
| FL         | Fludarabine + R          | Fludarabine, Rituximab                                                                | 2                    |
| FL         | Copanlisib               | Copanlisib                                                                            | 1                    |
| FL         | Ibritumomab              | Ibritumomab (both mono and in combo)                                                  | 2                    |
| FL         | Oftaumumab               | Oftaumumab (both mono and in combo)                                                   | 2                    |
| FL         | Obinutuzumab             | Obinutuzumab (only mono)                                                              | 2                    |
| FL         | Rituximab                | Rituximab (both mono and in combo)                                                    | 2                    |
| FL         | Axicabtagene Ciloleucel  | Axicabtagene Ciloleucel                                                               | 3                    |
| FL         | Tisagenlecleucel         | Tisagenlecleucel                                                                      | 3                    |
| <b>CLL</b> |                          |                                                                                       |                      |
| CLL        | Acalabrutinib            | Acalabrutinib monotherapy OR Acalabrutinib, Obinutuzumab (G)                          | 1 (2 if with G)      |
| CLL        | Chlorambucil             | Chlorambucil monotherapy OR Chlorambucil, Rituximab OR Chlorambucil, Obinutuzumab (G) | 1 (2 if with G or R) |

|     |                  |                                                                                 |                         |
|-----|------------------|---------------------------------------------------------------------------------|-------------------------|
| CLL | Duvelisib        | Duvelisib                                                                       | 1                       |
| CLL | Ibrutinib        | Ibrutinib                                                                       | 1                       |
| CLL | Lenalidomide     | Lenalidomide monotherapy OR Lenalidomide, Rituximab                             | 1 (2 if with rituximab) |
| CLL | Venetoclax       | Venetoclax monotherapy OR Venetoclax, Rituximab OR Venetoclax, Obinutuzumab (G) | 1 (2 if with rituximab) |
| CLL | Zanubrutinib     | Zanubrutinib                                                                    | 1                       |
| CLL | FCR              | Fludarabine, Cyclophosphamide, Rituximab                                        | 2                       |
| CLL | BR               | Bendamustine, Rituximab                                                         | 2                       |
| CLL | Pentostatin      | Pentostatin (mono or in combo)                                                  | 2                       |
| CLL | Fludarabine      | Fludarabine (mono or in combo)                                                  | 2                       |
| CLL | Rituximab        | Rituximab (mono or in combo)                                                    | 2                       |
| CLL | Ofatumumab       | Ofatumumab (mono or in combo)                                                   | 2                       |
| CLL | Obinutuzumab     | Obinutuzumab (mono or in combo)                                                 | 2                       |
| CLL | Alemtuzumab      | Alemtuzumab                                                                     | 2                       |
|     | Copanlisib       | Copanlisib                                                                      | 2                       |
| CLL | PI3K + Anti CD20 | (Idelalisib OR Duvelisib) AND (Rituximab OR Ofatumumab OR Obinutuzumab)         | 2                       |
| CLL | PI3K monotherapy | Idelalisib OR Duvelisib monotherapy                                             | 1                       |
| CLL | Anti-CD20 based  | Rituximab OR Ofatumumab OR Obinutuzumab                                         | 2                       |

|            |                           |                                                                                                                            |                              |
|------------|---------------------------|----------------------------------------------------------------------------------------------------------------------------|------------------------------|
|            | monotherapy               | monotherapy                                                                                                                |                              |
| CLL        | BCL-2 based therapy       | Venetoclax monotherapy or in combo with any other drug                                                                     | 1 (2 if with G or R)         |
| CLL        | BTK inhibitor monotherapy | Ibrutinib OR Acalabrutinib monotherapy or in combo with any other drug)                                                    | 1                            |
| <b>MCL</b> |                           |                                                                                                                            |                              |
| MCL        | Acalabrutinib             | Acalabrutinib                                                                                                              | 1                            |
| MCL        | Ibrutinib                 | Ibrutinib                                                                                                                  | 1                            |
| MCL        | Lenalidomide              | Lenalidomide OR Lenalidomide, Rituximab                                                                                    | 1 (2 if + R)                 |
| MCL        | Procarbazine              | Procarbazine <i>only</i> in combination with other drugs (Cyclophosphamide, Etoposide, Rituximab, OR Ifosfamide); not mono | 1,2, or 3 depending on combo |
| MCL        | Venetoclax                | Venetoclax monotherapy OR Venetoclax + Rituximab                                                                           | 1 (2 if + R)                 |
| MCL        | Zanubrutinib              | Zanubrutinib                                                                                                               | 1                            |
| MCL        | RCHOP                     | Rituximab, Cyclophosphamide, Doxorubicin, Vincristine                                                                      | 2                            |
| MCL        | BR                        | Bendamustine, Rituximab                                                                                                    | 2                            |
| MCL        | RDHAP                     | Rituximab, Cytarabine, Cisplatin                                                                                           | 3                            |
| MCL        | RHyperCVAD                | Rituximab, Cyclophosphamide, Vincristine, Doxorubicin                                                                      | 3                            |
| MCL        | NORDIC Regimen            | Cyclophosphamide, Cytarabine, Doxorubicin, Rituximab, Vincristine                                                          | 3                            |

|           |                  |                                                                                         |                 |
|-----------|------------------|-----------------------------------------------------------------------------------------|-----------------|
| MCL       | VR-CAP           | Bortezomib, Rituximab, Cyclophosphamide, Doxorubicin                                    | 2               |
| MCL       | RBAC (BR/CR)     | Rituximab, Bendamustine, Cytarabine OR Bendamustine, Rituximab OR Cytarabine, Rituximab | 2 (BR)<br>3(CR) |
| MCL       | RCEPP            | Rituximab, Cyclophosphamide, Etoposide, Procarbazine                                    | 2               |
| <b>MM</b> |                  |                                                                                         |                 |
| MM        | Thalidomide      | Thalidomide                                                                             | 1               |
| MM        | Panobinostat     | Panobinostat                                                                            | 1               |
| MM        | Ixazomib         | Ixazomib                                                                                | 1               |
| MM        | Cyclophosphamide | Cyclophosphamide                                                                        | 1               |
| MM        | Melphalan        | Melphalan                                                                               | 1               |
| MM        | Pomalidomide     | Pomalidomide                                                                            | 1               |
| MM        | Lenalidomide     | Lenalidomide                                                                            | 1               |
| MM        | Dexamethasone    | Dexamethasone                                                                           | 1               |
| MM        | Prednisone       | Prednisone                                                                              | 1               |
| MM        | Selinexor        | Selinexor                                                                               | 1               |
| MM        | Venetoclax       | Venetoclax                                                                              | 1               |
| MM        | RVD              | Lenalidomide, Bortezomib, Dexamethasone                                                 | 2               |
| MM        | CyBorD           | Cyclophosphamide, Bortezomib, Dexamethasone                                             | 2               |

|    |                 |                                                                                                                                                                                                                                   |   |
|----|-----------------|-----------------------------------------------------------------------------------------------------------------------------------------------------------------------------------------------------------------------------------|---|
| MM | KRD             | Carfilzomib, Lenalidomide, Dexamethasone                                                                                                                                                                                          | 2 |
| MM | Ixazomib/Cy/Dex | Ixazomib, Cyclophosphamide, Dexamethasone                                                                                                                                                                                         | 1 |
| MM | VTD             | Bortezomib, Thalidomide, Dexamethasone                                                                                                                                                                                            | 2 |
| MM | Cy/R/D          | Cyclophosphamide, Lenalidomide, Dexamethasone                                                                                                                                                                                     | 1 |
| MM | Dara/Cy/V/D     | Daratumumab, Cyclophosphamide, Bortezomib, Dexamethasone                                                                                                                                                                          | 2 |
| MM | Dara/VTD        | Daratumumab, Bortezomib, Thalidomide, Dexamethasone                                                                                                                                                                               | 2 |
| MM | V(T)D-PACE      | Bortezomib, Dexamethasone, Platinum (Cisplatin OR Carboplatin), Doxorubicin, Cyclophosphamide, Etoposide OR Bortezomib, Thalidomide, Dexamethasone, Platinum (Cisplatin OR Carboplatin), Doxorubicin, Cyclophosphamide, Etoposide | 3 |
| MM | Dara/RD         | Daratumumab, Lenalidomide, Dexamethasone                                                                                                                                                                                          | 2 |
| MM | Rd              | Lenalidomide, Dexamethasone                                                                                                                                                                                                       | 1 |
| MM | Vd              | Bortezomib, Dexamethasone                                                                                                                                                                                                         | 2 |
| MM | Kd              | Carfilzomib, Dexamethasone                                                                                                                                                                                                        | 2 |
| MM | KCyD            | Carfilzomib, Cyclophosphamide, Dexamethasone                                                                                                                                                                                      | 2 |
| MM | Ixa/Pom/Dex     | Ixazomib, Pomalidomide, Dexamethasone                                                                                                                                                                                             | 1 |
| MM | Ixa/RD          | Ixazomib, Lenalidomide, Dexamethasone                                                                                                                                                                                             | 1 |
| MM | Pom/VD          | Pomalidomide, Bortezomib, Dexamethasone                                                                                                                                                                                           | 2 |
| MM | Elo/VD          | Elotuzumab, Bortezomib, Dexamethasone                                                                                                                                                                                             | 2 |

|    |                  |                                                           |   |
|----|------------------|-----------------------------------------------------------|---|
| MM | EloRD            | Elotuzumab, Lenalidomide, Dexamethasone                   | 2 |
| MM | Elo/Pom/Dex      | Elotuzumab, Pomalidomide, Dexamethasone                   | 2 |
| MM | Panobinostat/VD  | Panobinostat, Bortezomib, Dexamethasone                   | 2 |
| MM | Seli/VD          | Selinexor, Bortezomib, Dexamethasone                      | 2 |
| MM | Bendamustine     | Bendamustine                                              | 2 |
| MM | Dara monotherapy | Daratumumab monotherapy                                   | 2 |
| MM | DCEP             | Dexamethasone, Cyclophosphamide, Etoposide, and Cisplatin | 3 |
| MM | SeliDex          | Selinexor, Dexamethasone                                  | 1 |
| MM | VenDex           | Venetoclax, Dexamethasone                                 | 1 |
| MM | Seli/dara/dex    | Selinexor, Daratumumab, Dexamethasone                     | 2 |
| MM | Seli/pom/dex     | Selinexor, Pomalidomide, Dexamethasone                    | 1 |

Abbreviations: AML, acute myeloid leukemia; CLL, chronic lymphocytic leukemia; DLBCL, diffuse large B-cell lymphoma; FL, follicular lymphoma; MCL, mantle cell lymphoma; MM, multiple myeloma.

**eTable 2.** ARIMA Model Parameters,  $(p,d,q)(P,D,Q)_m$

|                | Overall               | AML                   | DLBCL                 | FL                    | MCL                   | CLL                   | MM                    |
|----------------|-----------------------|-----------------------|-----------------------|-----------------------|-----------------------|-----------------------|-----------------------|
| <b>OralTx</b>  | $(2,1,2)(0,1,0)_{12}$ | $(1,0,2)(0,1,0)_{12}$ | $(0,1,1)(0,1,1)_{12}$ | $(2,1,1)(1,1,0)_{12}$ | $(1,0,1)(0,1,0)_{12}$ | $(0,1,1)(0,1,0)_{12}$ | $(2,0,3)(0,1,0)_{12}$ |
| <b>OutPtTx</b> | $(2,1,0)(0,1,0)_{12}$ | NA                    | $(0,1,0)(0,1,0)_{12}$ | $(2,1,0)(0,1,0)_{12}$ | $(0,1,1)(0,1,1)_{12}$ | $(0,1,2)(0,1,0)_{12}$ | $(3,1,2)(0,1,0)_{12}$ |
| <b>InPtTx</b>  | $(0,1,1)(0,1,1)_{12}$ | $(0,1,1)(0,1,0)_{12}$ | $(2,1,1)(0,1,0)_{12}$ | $(0,1,0)(0,1,1)_{12}$ | $(0,1,0)(1,1,0)_{12}$ | NA                    | $(0,1,1)(0,1,1)_{12}$ |

*Notes:*

*p and P are the non-seasonal and seasonal orders of autoregression (number of lagged observations);*

*d and D are the non-seasonal and seasonal orders of differencing;*

*q and Q are the non-seasonal and seasonal moving average orders (number of lagged errors);*

*m is the number of periods in a season (equal to 12 for monthly data);*

*NA indicates that no models were run for AML OutPtTx and CLL InPtTx patients.*

Abbreviations: AML, acute myeloid leukemia; ARIMA, autoregressive integrated moving average; CLL, chronic lymphocytic leukemia; DLBCL, diffuse large B-cell lymphoma; FL, follicular lymphoma; MCL, mantle cell lymphoma; MM, multiple myeloma.



**eTable 3.** Q Statistics and P Values for All Ljung-Box Q Tests of the Autocorrelation of ARIMA Model Residuals

|                | OralTx      |         | OutPtTx     |         | InPtTx      |         |
|----------------|-------------|---------|-------------|---------|-------------|---------|
|                | Q-statistic | P-value | Q-statistic | P-value | Q-statistic | P-value |
| <b>Overall</b> | 8.9         | 0.18    | 5.3         | 0.73    | 7.6         | 0.47    |
| <b>AML</b>     | 7.1         | 0.41    | NA          | NA      | 5.1         | 0.83    |
| <b>DLBCL</b>   | 4.4         | 0.82    | 11          | 0.34    | 7.3         | 0.40    |
| <b>FL</b>      | 6.4         | 0.38    | 15          | 0.70    | 7.9         | 0.54    |
| <b>MCL</b>     | 9.7         | 0.28    | 5.4         | 0.71    | 10          | 0.32    |
| <b>CLL</b>     | 8.7         | 0.46    | 7.7         | 0.46    | NA          | NA      |
| <b>MM</b>      | 14          | 0.14    | 7.2         | 0.21    | 7.8         | 0.45    |

Abbreviations: AML, acute myeloid leukemia; ARIMA, autoregressive integrated moving average; CLL, chronic lymphocytic leukemia; DLBCL, diffuse large B-cell lymphoma; FL, follicular lymphoma; MCL, mantle cell lymphoma; MM, multiple myeloma.

**eTable 4.** Percent Change in In-Person Visit Rates Across Entire Pandemic Year (March 1, 2020, to February 28, 2021)

| Treatment Type | Overall, % (95% PI)     | AML, % (95% PI)          | CLL, % (95% PI)         | DLBCL, % (95% PI)        | FL, % (95% PI)           | MCL, % (95% PI)          | MM, % (95% PI)            |
|----------------|-------------------------|--------------------------|-------------------------|--------------------------|--------------------------|--------------------------|---------------------------|
| OralTx         | -14.4<br>(-27.2 to 3.7) | -15.3<br>(-42.1 to 58.0) | -7.3<br>(-24.5 to 20.0) | -37.4<br>(-74.8 to >100) | -12.5<br>(-56.1 to >100) | -9.3<br>(-36.5 to 58.6)  | -15.7<br>(-26.2 to -1.5)  |
| OutPtTx        | -2.6<br>(-12.4 to 9.6)  | NA                       | -4.0<br>(-22.3 to 25.7) | 7.5<br>(-38.0 to >100)   | 6.4<br>(-24.1 to 78.2)   | -1.0<br>(-18.4 to 25.8)  | -1.7<br>(-9.3 to 7.2)     |
| InPtTx         | -0.8<br>(-14.7 to 18.7) | -6.1<br>(-18.7 to 11.1)  | NA                      | 11.4<br>(-26.0 to >100)  | 30.3<br>(-45.5 to >100)  | -12.9<br>(-47.3 to >100) | -18.9<br>(-43.8 to 45.3%) |

Notes:

Percentage change is calculated as [average actual in-person visit rates – average predicted in-person visit rates] / [average predicted in-person visit rates];

Positive percentages indicate an increase in in-person visit rates during the pandemic;

Negative percentages indicate a decrease in in-person visit rates during the pandemic.

AML OutPtTx and CLL InPtTx are both represented as NA as these disease-treatment types were not represented.

Abbreviations: AML, acute myeloid leukemia; CLL, chronic lymphocytic leukemia; DLBCL, diffuse large B-cell lymphoma; FL, follicular lymphoma; MCL, mantle cell lymphoma; MM, multiple myeloma; Tx, treatment.

**eTable 5.** In-Person Visit Rates in Year Before vs During Pandemic Over All Diseases Combined and by Disease and Treatment Type

| Disease | Treatment Type | 1 Year Before pandemic<br>(March 1, 2019-February 28, 2020) | During Pandemic<br>(March 1, 2020-February 28, 2021) |
|---------|----------------|-------------------------------------------------------------|------------------------------------------------------|
| Overall | OralTx         | 1.26                                                        | 1.07                                                 |
|         | OutPtTx        | 1.84                                                        | 1.70                                                 |
|         | InPtTx         | 3.62                                                        | 3.19                                                 |
| AML     | OralTx         | 4.17                                                        | 3.49                                                 |
|         | InPtTx         | 5.09                                                        | 4.57                                                 |
| CLL     | OralTx         | 0.96                                                        | 0.87                                                 |
|         | OutPtTx        | 1.12                                                        | 1.05                                                 |
| DLBCL   | OralTx         | 1.75                                                        | 1.26                                                 |
|         | OutPtTx        | 1.18                                                        | 1.03                                                 |
|         | InPtTx         | 1.90                                                        | 1.66                                                 |
| FL      | OralTx         | 0.91                                                        | 0.89                                                 |
|         | OutPtTx        | 1.21                                                        | 1.09                                                 |
|         | InPtTx         | 1.39                                                        | 1.22                                                 |
| MCL     | OralTx         | 1.29                                                        | 1.18                                                 |
|         | OutPtTx        | 1.71                                                        | 1.50                                                 |
|         | InPtTx         | 2.54                                                        | 2.22                                                 |

|    |         |      |      |
|----|---------|------|------|
| MM | OralTx  | 1.39 | 1.13 |
|    | OutPtTx | 3.07 | 2.87 |
|    | InPtTx  | 1.78 | 1.60 |

*Note: The following disease-treatment type combinations do not exist and thus are excluded from this table:  
AML-OutPtTx and CLL-InPtTx.*

Abbreviations: AML, acute myeloid leukemia; CLL, chronic lymphocytic leukemia; DLBCL, diffuse large B-cell lymphoma; FL, follicular lymphoma; MCL, mantle cell lymphoma; MM, multiple myeloma.

**eTable 6.** Telemedicine Visit Rates During Early vs Later Pandemic Months Over All Diseases Combined and by Disease and Treatment Type

| Disease | Treatment Type | Early Pandemic<br>(March 1, 2020-May 31, 2020) | Late Pandemic<br>(June 1, 2020-February 28, 2021) |
|---------|----------------|------------------------------------------------|---------------------------------------------------|
| Overall | OralTx         | 0.11                                           | 0.06                                              |
|         | OutPtTx        | 0.07                                           | 0.05                                              |
|         | InPtTx         | 0.10                                           | 0.06                                              |
| AML     | OralTx         | 0.14                                           | 0.13                                              |
|         | InPtTx         | 0.11                                           | 0.07                                              |
| CLL     | OralTx         | 0.09                                           | 0.05                                              |
|         | OutPtTx        | 0.06                                           | 0.04                                              |
| DLBCL   | OralTx         | 0.11                                           | 0.13                                              |
|         | OutPtTx        | 0.06                                           | 0.04                                              |
|         | InPtTx         | 0.10                                           | 0.05                                              |
| FL      | OralTx         | 0.28                                           | 0.16                                              |
|         | OutPtTx        | 0.06                                           | 0.04                                              |
|         | InPtTx         | 0.07                                           | 0.03                                              |
| MCL     | OralTx         | 0.13                                           | 0.07                                              |
|         | OutPtTx        | 0.07                                           | 0.03                                              |
|         | InPtTx         | 0.05                                           | 0.05                                              |

|    |         |      |      |
|----|---------|------|------|
| MM | OralTx  | 0.12 | 0.07 |
|    | OutPtTx | 0.09 | 0.06 |
|    | InPtTx  | 0.10 | 0.05 |

*Note: The following disease-treatment type combinations do not exist and thus are excluded from this table: AML-OutPtTx and CLL-InPtTx.*

Abbreviations: AML, acute myeloid leukemia; CLL, chronic lymphocytic leukemia; DLBCL, diffuse large B-cell lymphoma; FL, follicular lymphoma; MCL, mantle cell lymphoma; MM, multiple myeloma.
