# Supplementary material for: The COVID-19 Pandemic and In-Person Visit Rate Disruptions Among Patients With Hematologic Neoplasms in the US in 2020 to 2021
Source: PubMed Central journal article supplement — JAMA Netw Open. 2023 Jun 5;6(6):e2316642. doi: 10.1001/jamanetworkopen.2023.16642 (PMC10242428; doi:10.1001/jamanetworkopen.2023.16642), 2023-06-05
Supplement: jamanetwopen-e2316642-s002.pdf [file jamanetwopen-e2316642-s002.pdf]

## Data Sharing Statement

Goyal. The COVID-19 Pandemic and In-Person Visit Rate Disruptions Among Patients With Hematologic Neoplasms in the US in 2020 to 2021. *JAMA Netw Open*. Published June 05, 2023. doi:10.1001/jamanetworkopen.2023.16642

### Data

**Data available:** No

### Additional Information

**Explanation for why data not available:** The data that support the findings of this study have been originated by Flatiron Health, Inc. These de-identified data may be made available upon request for the specific purpose of replicating results in this manuscript, and are subject to a license agreement with Flatiron Health; interested researchers should contact <[DataAccess@flatiron.com](mailto:DataAccess@flatiron.com)> to determine licensing terms.
